# Supplementary material for: Association of Metformin Use with Iron Deficiency Anemia in Urban Chinese Patients with Type 2 Diabetes
Source: MDPI journal article supplement (doi:10.3390/nu15143081), 2023-07-08
Supplement: s1 [file s1]

## Supplement materials

### Association of metformin use with iron deficiency anemia in urban Chinese patients with type 2 diabetes

Supplementary Table S1. Multivariable-adjusted HRs (95% CIs) for risk of iron deficiency by metformin use in patients who developed iron deficiency after one year of follow-up.

|                            | Case | Cases/PYs (/1000) | HR (95%CI)        |
|----------------------------|------|-------------------|-------------------|
| Non-metformin              | 2018 | 31.70             | 1.00              |
| Metformin                  | 1412 | 19.92             | 0.61 (0.57, 0.65) |
| Proportion of days covered |      |                   |                   |
| <20%                       | 289  | 17.09             | 0.49 (0.43, 0.56) |
| 20%-79%                    | 337  | 13.37             | 0.42 (0.37, 0.47) |
| ≥80%                       | 786  | 27.33             | 0.84 (0.78, 0.92) |

Supplementary Table S2. Multivariable-adjusted HRs (95% CIs) for risk of iron deficiency by metformin use in patients with gastrointestinal bleeding, moderate to severe kidney diseases, and malignant tumors at baseline were excluded .

|                            | Case | Person-year | Cases/PYs (/1000) |
|----------------------------|------|-------------|-------------------|
| non-metformin              | 2469 | 40.67       | 1.00              |
| metformin                  | 1773 | 25.69       | 0.62 (0.58, 0.66) |
| proportion of days covered |      |             |                   |
| <20%                       | 307  | 18.87       | 0.44 (0.39, 0.49) |
| 20%-79%                    | 377  | 15.39       | 0.39 (0.35, 0.43) |
| ≥80%                       | 1089 | 38.58       | 0.92 (0.86, 0.99) |

Supplementary Table S3. Baseline demographic characteristics of included patients (taking only one type of hypoglycemic drug) before and after propensity score matching.

| Variable                  |           | Metformin (N=377) | Non-metformin (N=377) | SMD*, % | P     |
|---------------------------|-----------|-------------------|-----------------------|---------|-------|
| Age, y                    | Unmatched | 52.65             | 63.27                 | -77.2   | 0.000 |
|                           | Matched   | 52.65             | 53.34                 | -5      | 0.440 |
| Female, %                 | Unmatched | 33.33             | 36.80                 | -7.3    | 0.150 |
|                           | Matched   | 33.33             | 30.20                 | 6.6     | 0.315 |
| Date of diagnosis of T2DM | Unmatched | 2011-06           | 2011-05               | 10.9    | 0.031 |
|                           | Matched   | 2011-06           | 2011-05               | 10.2    | 0.127 |
| Comorbidity index         | Unmatched | 0.94              | 1.48                  | -41.7   | 0.000 |
|                           | Matched   | 0.94              | 0.90                  | 2.9     | 0.554 |
| Number of visits/y        | Unmatched | 8.11              | 15.63                 | -33.1   | 0.000 |
|                           | Matched   | 8.11              | 7.48                  | 2.8     | 0.586 |
| Gastric acid inhibitor, % | Unmatched | 20.81             | 48.81                 | -61.5   | 0.000 |
|                           | Matched   | 20.81             | 17.00                 | 8.3     | 0.147 |

|              |           |       |       |       |       |
|--------------|-----------|-------|-------|-------|-------|
| Vitamin C, % | Unmatched | 28.86 | 49.01 | -42.2 | 0.000 |
|              | Matched   | 28.86 | 26.85 | 4.2   | 0.502 |

---

\*Standardized mean difference, SMD<10% was considered to be highly matched between groups.

Supplementary Table S4. Multivariable-adjusted HRs (95% CIs) for risk of iron deficiency by metformin use in patients taking only one type of hypoglycemic drug .

|                            | Total | Case | Cases/PYs (/1000) | HR (95%CI) |
|----------------------------|-------|------|-------------------|------------|
| Non-metformin              | 411   | 33   | 2138              | 15.43      |
| Metformin                  | 411   | 15   | 2298              | 6.53       |
| Proportion of days covered |       |      |                   |            |
| <20%                       | 145   | 3    | 838               | 3.58       |
| 20%-79%                    | 173   | 3    | 1014              | 2.96       |
| ≥80%                       | 93    | 9    | 446               | 20.20      |
